# Supplementary material for: Post-Translational Modifications of Histones Are Versatile Regulators of Fungal Development and Secondary Metabolism
Source: MDPI journal article supplement (doi:10.3390/toxins14050317), 2022-04-29
Supplement: s1 [file s1]

# Supplementary Materials: Post-Translational Modifications of Histones Are Versatile Regulators of Fungal Development and Secondary Metabolism

Aurelie Etier, Fabien Dumetz, Sylvain Chéreau and Nadia Ponts

**Table S1.** Histones and their post-translational modification associated with *S. cerevisiae*, *S. pombe*, *C. albicans*, *N. crassa*, *F. graminearum* and *A. nidulans*.

| HISTONE | SPECIES                                                       | RESIDUE <sup>1</sup> | PTM                                           | REFERENCES                      |
|---------|---------------------------------------------------------------|----------------------|-----------------------------------------------|---------------------------------|
| H2A     | <i>S. cerevisiae</i>                                          | S1                   | Acetylation<br>Phosphorylation                | [188,189]<br>[190]              |
|         | <i>S. cerevisiae</i><br><i>S. pombe</i>                       | K4                   | Acetylation                                   | [191]<br>[192]                  |
|         | <i>F. graminearum</i>                                         | K5                   | Acetylation                                   | [193]                           |
|         | <i>S. cerevisiae</i>                                          | K7                   | Acetylation                                   | [191,194]                       |
|         | <i>S. pombe</i>                                               | K8                   | Acetylation                                   | [192]                           |
|         | <i>N. crassa</i>                                              | K9                   | Acetylation                                   | [195]                           |
|         | <i>S. cerevisiae</i>                                          | S10                  | Phosphorylation                               | [190]                           |
|         | <i>S. cerevisiae</i>                                          | K13                  | Acetylation                                   | [196]                           |
|         | <i>S. cerevisiae</i>                                          |                      | Succinylation                                 | [144]                           |
|         | <i>S. cerevisiae</i>                                          | S15                  | Phosphorylation                               | [197]                           |
|         | <i>C. albicans</i>                                            | S18                  | Phosphorylation                               | [198]                           |
|         | <i>S. cerevisiae</i><br><i>S. pombe</i>                       | S19                  | Phosphorylation                               | [199]<br>[200]                  |
|         | <i>S. cerevisiae</i>                                          | K21                  | Succinylation<br>Ubiquitylation               | [144]<br>[201]                  |
|         | <i>N. crassa</i>                                              | S21                  | Phosphorylation                               | [202]                           |
|         | <i>S. cerevisiae</i>                                          | T25                  | Phosphorylation                               | [203]                           |
|         | <i>S. cerevisiae</i>                                          | K96                  | Acetylation<br>Ubiquitylation                 | [204]<br>[201]                  |
|         | <i>S. cerevisiae</i><br><i>S. pombe</i><br><i>C. albicans</i> | Q105                 | Methylation                                   | [205]<br>[205]<br>[205]         |
|         | <i>S. cerevisiae</i>                                          | K119                 | Acetylation<br>Malonylation<br>Ubiquitylation | [204]<br>[144,206]<br>[135]     |
|         | <i>S. pombe</i>                                               | T120                 | Phosphorylation                               | [200]                           |
|         | <i>S. cerevisiae</i><br><i>S. pombe</i><br><i>C. albicans</i> | S121                 | Phosphorylation                               | [199,102,106]<br>[207]<br>[107] |
|         | <i>S. cerevisiae</i><br><i>S. pombe</i>                       | K123                 | Acetylation                                   | [208]<br>[192]                  |
|         | <i>S. pombe</i>                                               | T124                 | Phosphorylation                               | [200]                           |
|         | <i>S. cerevisiae</i><br><i>N. crassa</i>                      | T125                 | Phosphorylation                               | [209]<br>[210]                  |
|         | <i>S. cerevisiae</i>                                          | K126                 | Acetylation<br>Sumoylation                    | [208]<br>[135]                  |
|         | <i>S. cerevisiae</i><br><i>S. pombe</i><br><i>C. albicans</i> | S128                 | Phosphorylation                               | [199,211,103]<br>[212]<br>[198] |

## H2B

|                       |      |                 |                   |
|-----------------------|------|-----------------|-------------------|
| <i>N. crassa</i>      | S130 | Phosphorylation | [210]             |
| <i>S. cerevisiae</i>  | S1   | Phosphorylation | [190]             |
| <i>S. pombe</i>       |      |                 | [200]             |
| <i>N. crassa</i>      | K3   | Acetylation     | [195]             |
|                       |      | Methylation     | [195]             |
| <i>S. pombe</i>       | K5   | Acetylation     | [192]             |
| <i>S. cerevisiae</i>  | K6   | Acetylation     | [135]             |
|                       |      | Sumoylation     | [133,135,136,138] |
| <i>S. cerevisiae</i>  |      | Acetylation     | [135]             |
|                       | K7   | Sumoylation     | [135,21,133,136]  |
| <i>N. crassa</i>      |      | Acetylation     | [213]             |
|                       |      | Methylation     | [213]             |
| <i>N. crassa</i>      | K8   | Acetylation     | [195]             |
| <i>S. cerevisiae</i>  | S10  | Phosphorylation | [214–216]         |
| <i>S. pombe</i>       | K10  | Acetylation     | [192]             |
| <i>S. cerevisiae</i>  | K11  | Acetylation     | [135,194,217,218] |
| <i>N. crassa</i>      | S11  | Phosphorylation | [202]             |
| <i>N. crassa</i>      | K12  | Acetylation     | [195]             |
| <i>S. pombe</i>       | K15  | Acetylation     | [192]             |
| <i>S. cerevisiae</i>  | K16  | Acetylation     | [135,194,217,218] |
|                       |      | Sumoylation     | [135]             |
| <i>S. cerevisiae</i>  | K17  | Acetylation     | [219]             |
|                       |      | Sumoylation     | [133,135,136]     |
| <i>N. crassa</i>      | S18  | Phosphorylation | [202]             |
| <i>N. crassa</i>      | K19  | Acetylation     | [195]             |
| <i>S. cerevisiae</i>  | K21  | Acetylation     | [219]             |
|                       |      | Butyrylation    | [219]             |
| <i>S. cerevisiae</i>  | K22  | Acetylation     | [219]             |
|                       |      | Methylation     | [219]             |
| <i>S. cerevisiae</i>  | S24  | Phosphorylation | [190,194]         |
| <i>S. cerevisiae</i>  | S26  | Phosphorylation | [220]             |
| <i>N. crassa</i>      | K28  | Acetylation     | [195]             |
| <i>N. crassa</i>      | K29  | Acetylation     | [195]             |
| <i>S. cerevisiae</i>  | K30  | Acetylation     | [196]             |
| <i>S. cerevisiae</i>  | K34  | Succinylation   | [144,221]         |
| <i>S. cerevisiae</i>  | K37  | Methylation     | [219]             |
|                       |      | Succinylation   | [144]             |
| <i>S. cerevisiae</i>  | T39  | Phosphorylation | [222]             |
| <i>C. albicans</i>    |      |                 | [198]             |
| <i>S. cerevisiae</i>  | Y40  | Phosphorylation | [222]             |
| <i>S. cerevisiae</i>  | S41  | Phosphorylation | [223,224]         |
| <i>C. albicans</i>    |      |                 | [198]             |
| <i>S. cerevisiae</i>  | S42  | Phosphorylation | [199]             |
| <i>C. albicans</i>    |      |                 | [198]             |
| <i>N. crassa</i>      | K44  | Methylation     | [213]             |
| <i>S. cerevisiae</i>  | K46  | Ubiquitylation  | [201]             |
| <i>F. graminearum</i> | T47  | Phosphorylation | [112]             |
| <i>N. crassa</i>      | Y47  | Phosphorylation | [202]             |
| <i>N. crassa</i>      | S48  | Phosphorylation | [202]             |
| <i>S. cerevisiae</i>  | K49  | Ubiquitylation  | [201]             |
| <i>N. crassa</i>      | Y50  | Phosphorylation | [202]             |
| <i>N. crassa</i>      | K53  | Acetylation     | [213]             |
|                       |      | Methylation     | [213]             |
| <i>N. crassa</i>      | K56  | Acetylation     | [213]             |

|    |                       |      |                 |                                  |
|----|-----------------------|------|-----------------|----------------------------------|
| H3 |                       |      | Methylation     | [213]                            |
|    | <i>S. cerevisiae</i>  | S58  | Phosphorylation | [225]                            |
|    | <i>S. cerevisiae</i>  | K60  | Ubiquitylation  | [201]                            |
|    | <i>C. albicans</i>    | S63  | Phosphorylation | [198]                            |
|    | <i>A. nidulans</i>    | S77  | Phosphorylation | [226]                            |
|    | <i>S. cerevisiae</i>  | K82  | Ubiquitylation  | [201]                            |
|    | <i>S. cerevisiae</i>  | K88  | Ubiquitylation  | [201]                            |
|    | <i>N. crassa</i>      | K89  | Methylation     | [213]                            |
|    | <i>N. crassa</i>      | K95  | Acetylation     | [213]                            |
|    |                       |      | Methylation     | [213]                            |
|    | <i>N. crassa</i>      | R102 | Methylation     | [213]                            |
|    | <i>N. crassa</i>      | R109 | Methylation     | [213]                            |
|    | <i>S. cerevisiae</i>  | K111 | Ubiquitylation  | [201]                            |
|    | <i>S. cerevisiae</i>  | S115 | Phosphorylation | [199]                            |
|    | <i>N. crassa</i>      | K118 | Acetylation     | [213]                            |
|    | <i>S. pombe</i>       | K119 | Ubiquitylation  | [227]                            |
|    | <i>S. cerevisiae</i>  | T122 | Phosphorylation | [201]                            |
|    | <i>N. crassa</i>      | S122 | Phosphorylation | [202]                            |
|    | <i>S. cerevisiae</i>  | K123 | Ubiquitylation  | [117-119,123,129,201]            |
|    | <i>S. cerevisiae</i>  | S126 | Phosphorylation | [201]                            |
|    | <i>N. crassa</i>      | K126 | Methylation     | [213]                            |
|    | <i>S. cerevisiae</i>  | S127 | Phosphorylation | [201]                            |
|    | <i>S. cerevisiae</i>  | T128 | Phosphorylation | [228]                            |
|    | <i>N. crassa</i>      | K136 | Methylation     | [213]                            |
|    | <i>S. cerevisiae</i>  |      | Acetylation     | [191]                            |
|    |                       |      | Methylation     | [155,229-234]                    |
|    | <i>S. pombe</i>       |      | Methylation     | [235,236]                        |
|    | <i>N. crassa</i>      | K4   | Acetylation     | [195]                            |
|    |                       |      | Methylation     | [80]                             |
|    | <i>F. graminearum</i> |      | Methylation     | [67]                             |
|    |                       |      | Acetylation     | [193]                            |
|    | <i>A. nidulans</i>    |      | Methylation     | [19,95]                          |
|    | <i>S. cerevisiae</i>  | T6   | phosphorylation | [190]                            |
|    | <i>S. cerevisiae</i>  |      | Acetylation     | [39,155,194,230,237]             |
|    |                       |      | Crotonylation   | [238]                            |
|    | <i>S. pombe</i>       |      | Methylation     | [240]                            |
|    |                       |      | Acetylation     | [241]                            |
|    | <i>C. albicans</i>    | K9   | Acetylation     | [195]                            |
|    | <i>N. crassa</i>      |      | Methylation     | [242]                            |
|    | <i>F. graminearum</i> |      | Methylation     | [45]                             |
|    |                       |      | Acetylation     | [45]                             |
|    | <i>A. nidulans</i>    |      | Acetylation     | [56]                             |
|    |                       |      | Methylation     | [57]                             |
|    | <i>S. cerevisiae</i>  | S10  | Phosphorylation | [110,243,244]                    |
|    | <i>S. pombe</i>       |      |                 | [245]                            |
|    | <i>S. cerevisiae</i>  | T11  | Phosphorylation | [190]                            |
|    | <i>S. cerevisiae</i>  |      | Acetylation     | [39,155,191,194,230,237,243,244] |
|    |                       |      | Methylation     | [155]                            |
|    |                       |      | Butyrylation    | [246]                            |
|    | <i>C. albicans</i>    | K14  | Acetylation     | [241]                            |
|    | <i>N. crassa</i>      |      | Acetylation     | [195]                            |
|    | <i>F. graminearum</i> |      | Acetylation     | [45]                             |
|    | <i>A. nidulans</i>    |      | Acetylation     | [56]                             |

|                       |     |                 |                   |
|-----------------------|-----|-----------------|-------------------|
| <i>S. cerevisiae</i>  |     | Acetylation     | [39,155,194,230]  |
|                       |     | Methylation     | [155]             |
|                       |     | Butyrylation    | [246]             |
| <i>C. albicans</i>    | K18 | Acetylation     | [195]             |
| <i>N. crassa</i>      |     | Acetylation     | [195]             |
| <i>F. graminearum</i> |     | Acetylation     | [45]              |
| <i>A. nidulans</i>    |     | Acetylation     | [21]              |
| <i>S. cerevisiae</i>  |     | Acetylation     | [155,194]         |
|                       |     | Methylation     | [155]             |
|                       |     | Propionylation  | [219]             |
|                       | K23 | Butyrylation    | [246]             |
| <i>C. albicans</i>    |     | Acetylation     | [241]             |
| <i>N. crassa</i>      |     | Acetylation     | [195]             |
| <i>F. graminearum</i> |     | Acetylation     | [193]             |
| <i>A. nidulans</i>    | R26 | Methylation     | [88]              |
| <i>S. cerevisiae</i>  |     | Acetylation     | [155,194]         |
|                       |     | Methylation     | [155]             |
|                       |     | Ubiquitylation  | [201]             |
|                       |     | Butyrylation    | [219]             |
| <i>C. albicans</i>    | K27 | Acetylation     | [241]             |
| <i>N. crassa</i>      |     | Acetylation     | [195]             |
|                       |     | Methylation     | [195,247]         |
| <i>F. graminearum</i> |     | Acetylation     | [45]              |
|                       |     | Methylation     | [63]              |
| <i>A. nidulans</i>    |     | Methylation     | [21]              |
| <i>S. cerevisiae</i>  | S28 | Phosphorylation | [201]             |
| <i>S. cerevisiae</i>  | S31 | Phosphorylation | [201]             |
| <i>S. cerevisiae</i>  |     | Acetylation     | [155,248]         |
|                       |     | Methylation     | [155,231,249,250] |
| <i>S. pombe</i>       | K36 | Methylation     | [251]             |
| <i>C. albicans</i>    |     | Acetylation     | [241]             |
| <i>N. crassa</i>      |     | Acetylation     | [195]             |
|                       |     | Methylation     | [195,252]         |
| <i>A. nidulans</i>    |     | Methylation     | [253]             |
| <i>S. cerevisiae</i>  |     | Acetylation     | [188–191]         |
|                       |     | Methylation     | [254]             |
|                       |     | Ubiquitylation  | [219]             |
|                       | K37 | Methylation     | [241]             |
| <i>S. pombe</i>       |     | Acetylation     | [195]             |
| <i>C. albicans</i>    |     | Acetylation     | [195]             |
| <i>N. crassa</i>      |     | Methylation     | [195]             |
| <i>S. cerevisiae</i>  | Y41 | Phosphorylation | [199,200]         |
| <i>S. pombe</i>       |     |                 | [200]             |
| <i>S. cerevisiae</i>  | K42 | Ubiquitylation  | [255]             |
| <i>S. cerevisiae</i>  |     | Acetylation     | [256–259]         |
|                       |     | Ubiquitylation  | [201]             |
|                       |     | Malonylation    | [144]             |
|                       | K56 | Propionylation  | [219]             |
| <i>S. pombe</i>       |     | Acetylation     | [260]             |
| <i>C. albicans</i>    |     | Acetylation     | [241]             |
| <i>N. crassa</i>      |     | Acetylation     | [195]             |
| <i>S. cerevisiae</i>  |     |                 | [199]             |
| <i>S. pombe</i>       | S57 | Phosphorylation | [200]             |
| <i>C. albicans</i>    |     |                 | [198]             |

|    |                       |      |                 |                   |
|----|-----------------------|------|-----------------|-------------------|
| H4 | <i>S. cerevisiae</i>  | T58  | Phosphorylation | [228]             |
|    | <i>S. pombe</i>       |      |                 | [200]             |
|    | <i>S. cerevisiae</i>  | K64  | Acetylation     | [155]             |
|    |                       |      | Ubiquitylation  | [261]             |
|    | <i>S. cerevisiae</i>  |      | Acetylation     | [204]             |
|    |                       | K79  | Methylation     | [262–264]         |
|    |                       |      | Ubiquitylation  | [201]             |
|    |                       |      | Succinylation   | [144]             |
|    | <i>N. crassa</i>      |      | Methylation     | [195]             |
|    | <i>S. cerevisiae</i>  | Y99  | Phosphorylation | [265]             |
|    | <i>S. cerevisiae</i>  | K115 | Acetylation     | [257]             |
|    |                       |      | Ubiquitylation  | [266]             |
|    | <i>S. cerevisiae</i>  | K121 | Acetylation     | [196]             |
|    |                       |      | Ubiquitylation  | [255]             |
|    | <i>S. cerevisiae</i>  | K122 | Ubiquitylation  | [255]             |
|    | <i>S. cerevisiae</i>  | K125 | Ubiquitylation  | [255]             |
|    | <i>S. cerevisiae</i>  | S1   | Phosphorylation | [100,101,203]     |
|    | <i>A. nidulans</i>    | R3   | Methylation     | [89]              |
|    | <i>S. cerevisiae</i>  |      | Acetylation     | [191,204,267,268] |
|    |                       |      | Sumoylation     | [135,136]         |
|    |                       |      | Butyrylation    | [219,246]         |
|    | <i>S. pombe</i>       | K5   | Acetylation     | [269]             |
|    | <i>C. albicans</i>    |      | Acetylation     | [270]             |
|    | <i>N. crassa</i>      |      | Acetylation     | [195]             |
|    | <i>F. graminearum</i> |      | Acetylation     | [193]             |
|    | <i>S. cerevisiae</i>  |      | Acetylation     | [204,267,271]     |
|    |                       |      | Sumoylation     | [135,136]         |
|    |                       | K8   | Butyrylation    | [219,246]         |
|    | <i>S. pombe</i>       |      | Acetylation     | [269]             |
|    | <i>N. crassa</i>      |      | Acetylation     | [195]             |
|    | <i>F. graminearum</i> |      | Acetylation     | [193]             |
|    | <i>S. cerevisiae</i>  |      | Acetylation     | [204,267,268,272] |
|    |                       |      | Sumoylation     | [135,136]         |
|    |                       |      | Butyrylation    | [219,246]         |
|    | <i>S. pombe</i>       | K12  | Acetylation     | [269]             |
|    | <i>C. albicans</i>    |      | Acetylation     | [270]             |
|    | <i>N. crassa</i>      |      | Acetylation     | [195]             |
|    | <i>F. graminearum</i> |      | Acetylation     | [193]             |
|    | <i>A. nidulans</i>    |      | Acetylation     | [21]              |
|    | <i>S. cerevisiae</i>  |      | Acetylation     | [237,267,271]     |
|    |                       |      | Sumoylation     | [135,136]         |
|    | <i>S. pombe</i>       | K16  | Acetylation     | [273]             |
|    | <i>C. albicans</i>    |      | Acetylation     | [270]             |
|    | <i>N. crassa</i>      |      | Acetylation     | [195]             |
|    | <i>F. graminearum</i> |      | Acetylation     | [193]             |
|    | <i>S. cerevisiae</i>  |      | Methylation     | [274]             |
|    |                       |      | Sumoylation     | [135,136]         |
|    | <i>S. pombe</i>       | K20  | Methylation     | [275]             |
|    | <i>N. crassa</i>      |      | Acetylation     | [195]             |
|    |                       |      | Methylation     | [195]             |
|    | <i>F. graminearum</i> |      | Methylation     | [276]             |
|    | <i>S. cerevisiae</i>  | K31  | Acetylation     | [204]             |
|    |                       |      | Succinylation   | [144]             |
|    | <i>S. pombe</i>       | S47  | Phosphorylation | [277]             |

|                      |     |                 |               |
|----------------------|-----|-----------------|---------------|
| <i>C.albicans</i>    | S49 | Phosphorylation | [198]         |
| <i>S. cerevisiae</i> | R55 | Methylation     | [219]         |
| <i>S. cerevisiae</i> | K59 | Acetylation     | [204]         |
| <i>S. cerevisiae</i> | S60 | Phosphorylation | [222,278]     |
| <i>S. cerevisiae</i> | S64 | Phosphorylation | [199,222,278] |
| <i>S. cerevisiae</i> | K77 | Acetylation     | [279]         |
|                      |     | Succinylation   | [144]         |
|                      |     | Malonylation    | [144]         |
| <i>S. cerevisiae</i> | K79 | Acetylation     | [279]         |
| <i>S. cerevisiae</i> | T80 | Phosphorylation | [105]         |
| <i>S. cerevisiae</i> | K91 | Acetylation     | [204]         |
|                      |     | Glutarylation   | [280]         |

<sup>1</sup> Initiator methionine is clipped off from mature histone proteins (*e.g.*, see a) and, by convention, residue numbering does not include it. This rule for numbering has been applied here. In addition, we followed the Brno nomenclature for histone modifications, with positions referring to those used in the literature for the 'closest' model organism. Histone protein sequence alignments with numbering are provided Figure 2. <sup>2</sup> Not available.
